# Supplementary material for: Therapeutic targeting Tudor domains in leukemia via CRISPR-Scan Assisted Drug Discovery
Source: PubMed Central journal article supplement (PMC10889360; doi:10.1126/sciadv.adk3127), 2024-02-23
Supplement: sciadv.adk3127_sm.pdf [file sciadv.adk3127_sm.pdf]

Supplementary Materials for  
**Therapeutic targeting Tudor domains in leukemia via CRISPR-Scan Assisted  
Drug Discovery**

Anthony K.N. Chan *et al.*

Corresponding author: Chun-Wei Chen, [cweichen@coh.org](mailto:cweichen@coh.org)

*Sci. Adv.* **10**, eadk3127 (2024)  
DOI: 10.1126/sciadv.adk3127

**The PDF file includes:**

Figs. S1 to S13  
Table S1  
Legends for data S1 to S10

**Other Supplementary Material for this manuscript includes the following:**

Data S1 to S10

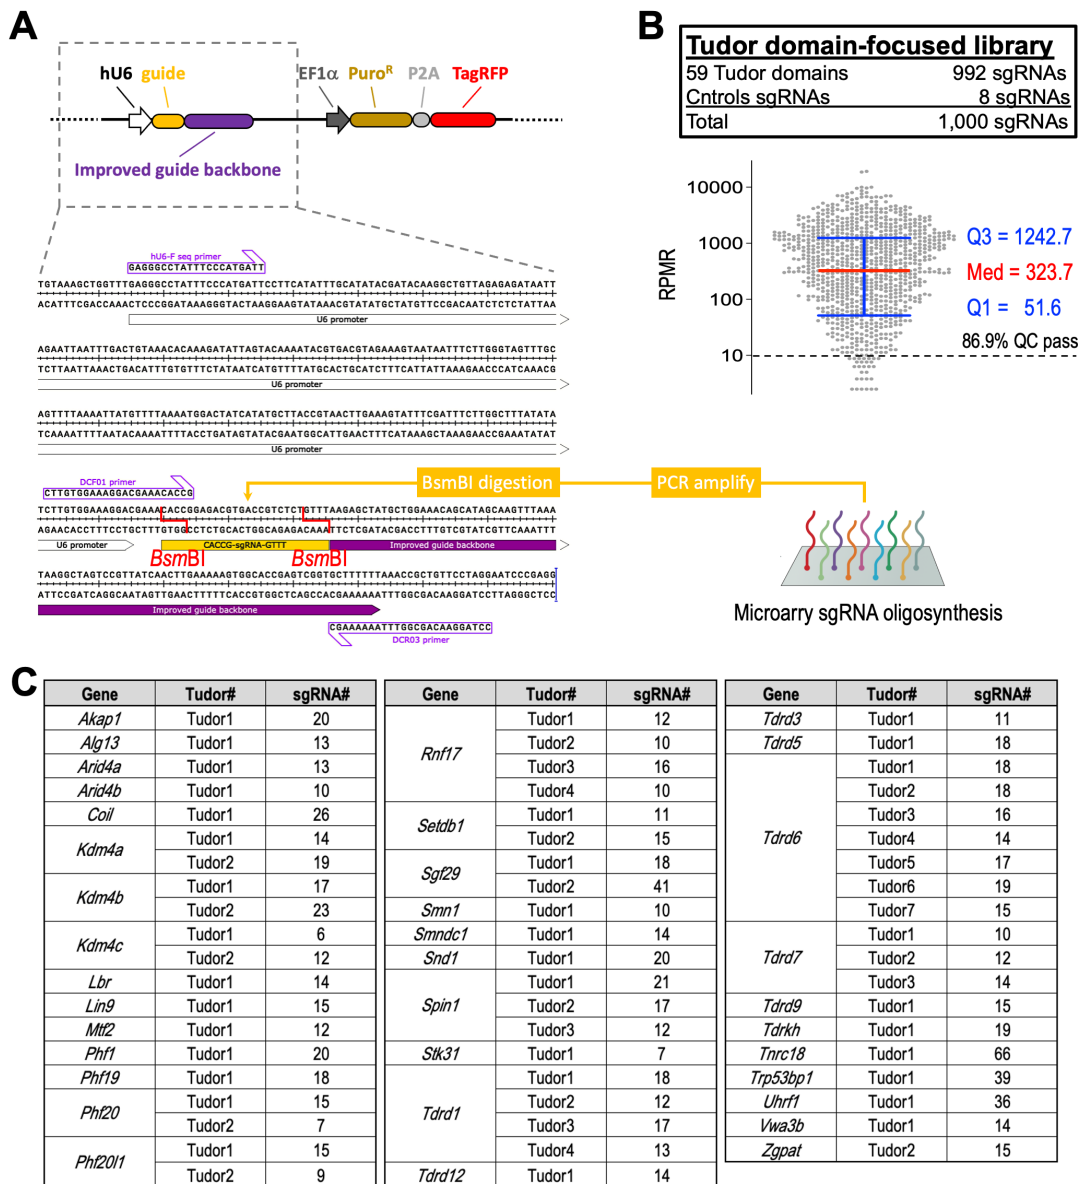

**fig. S1. Tudor domain-focused CRISPR screen library used in this study.**

(A) Map of the ipUSEPR vector expressing a sgRNA together with a puromycin-resistant gene (*Puro<sup>R</sup>*) and a TagRFP fluorescent protein. Primers for Sanger (hU6-F\_seq) and Illumina (DCF01 and DCR03) sequencing are listed. (B) Distribution of individual sgRNA frequencies RPMR (reads per million reads) in the Tudor domain-focused CRISPR library (total 1,000 sgRNAs). 86.9% of sgRNA in this library passed the QC by exhibiting frequency  $\geq 10$  RPMR. (C) Summary of the sgRNA distribution in the Tudor domain-focused CRISPR library targeting 59 Tudor domains (across 36 Tudor domain-containing genes) in the mouse genome.

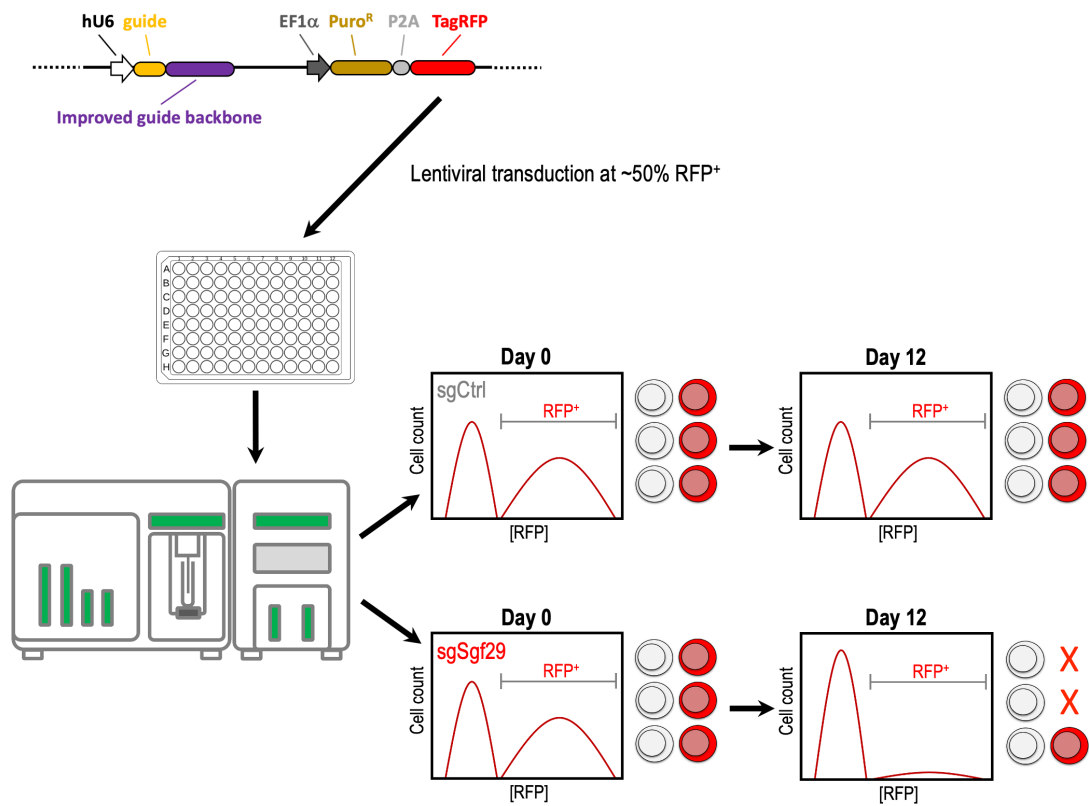

fig. S2. Schematic outline of the RFP flow cytometric growth competition assay.

### A Single sgRNA system:

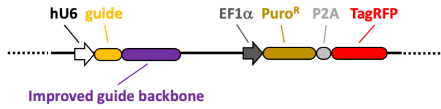

#### Single sgRNA used in this study:

| sgRNA_ID   | Guide sequence       |
|------------|----------------------|
| sgCtrl#1   | GATTCTAAAACGGATTACCA |
| sgCtrl#2   | GGATGATAACTGGTCCGCAG |
| sgCtrl#3   | GAAGATGGGCGGGAGTCTTC |
| sg_Sgf29#1 | CCAGGTTTCCCGATCCAGAG |
| sg_Sgf29#2 | TGTAAGTACTACTTCAGCT  |
| sg_Sgf29#3 | CATAAGAGGTGTCTTCAAAC |
| sg_MYC     | GCCGTATTTCTACTGCGACG |
| sg_SGF29#1 | TGTGGCTCAGAGATACGTGG |
| sg_SGF29#2 | CGGTAGAAGCAGGTAGTCTG |
| sg_SGF29#3 | AGCAGGTAGTCTGGGGATAC |
| sg_SGF29#4 | GATCAGGGCGCGGTAGAAGC |
| sgKat2a#1  | CCACCTGATGAACACCTAA  |
| sgKat2a#2  | TATGCTGACGAGTACGCCAT |
| sgKat2b#1  | CATACTCATCTGCATATGTG |
| sgKat2b#2  | TATGCAGATGAGTATGCCAT |
| sg_mRpl8#1 | GCGCACGTGAAGCACCGTAA |
| sg_mRpl8#2 | GACTGTGGCGTAGTTCCCGG |
| sg_mRps2#1 | AGGTAAGCTGAAGACAAGG  |
| sg_mRps2#2 | ATACCTACCAAAGTTGCCCA |

### B Dual sgRNA system:

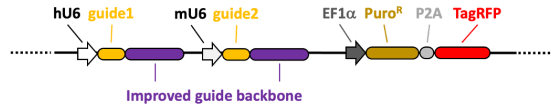

#### Dual sgRNA used in Figure 2:

| sgRNA_ID     | Guide 1 sequence     | Guide 2 sequence     |
|--------------|----------------------|----------------------|
| sgCtrl-dual  | GATTCTAAAACGGATTACCA | GGATGATAACTGGTCCGCAG |
| sgSgf29-dual | TGTAAGTACTACTTCAGCT  | CATAAGAGGTGTCTTCAAAC |

#### Dual sgRNA used in Figure 3:

| sgRNA_ID     | Guide 1 sequence     | Guide 2 sequence     |
|--------------|----------------------|----------------------|
| sgCtrl-dual  | GAAGATGGGCGGGAGTCTTC | GGATGATAACTGGTCCGCAG |
| sgSGF29-dual | CGGTAGAAGCAGGTAGTCTG | TGTGGCTCAGAGATACGTGG |

fig. S3. Single and dual sgRNA sequences used in this study.

**A**

**cDNA sequence Identities: 676/880 (77%)**

|                 |     |                                                                |     |
|-----------------|-----|----------------------------------------------------------------|-----|
| Wild-type SGF29 | 1   | ATGGCCCTCGTGTCTGCCGATTCCCGCATTGCAGAACTTCTCACAGAGTCCATCAGCTG    | 60  |
| Optimized SGF29 | 1   | .....T..T..C..A..T.....A.G.....G..C..G..C..A..A.....T..        | 60  |
| Wild-type SGF29 | 61  | ATCAAACAAACCCAGGAAGAGCGTTTCGCGGAGC-GAACACAACCTTAGTGAACATCCAGAA | 119 |
| Optimized SGF29 | 61  | .....G..G..A.....G.....CA-..C..T..T..G.....T..G..T.....A..A..  | 119 |
| Wild-type SGF29 | 120 | GACCCATGAGCGGATGCAGACAGAGAACAAGATTCTCCCTATTACCGGACAAAGCTGCG    | 179 |
| Optimized SGF29 | 120 | A..A.....A.....C.....T.....C..C.....A..A..T..T..AA..           | 179 |
| Wild-type SGF29 | 180 | TGGCCTCTACACAACCCGCAAGGCCGATGCAGAGGCTGAGTGAACATCCTTCGGAAGC     | 239 |
| Optimized SGF29 | 180 | A..A.....T..C.....C.....A.....T..A..G.....                     | 239 |
| Wild-type SGF29 | 240 | TCTGGACAAGATCGCGGAAATCAAGTCTCTGTTGGAAGAGAGGCGGATTGCGCCAAAGAT   | 299 |
| Optimized SGF29 | 240 | AT..A..T.....C..G..T.....G..T..A.....C..CA..A..A.....          | 299 |
| Wild-type SGF29 | 300 | TGCCGGTCTCTACAATGACTCGGAGCCACCCCGAAGACCATGCGCAGAGGGGTGCTGAT    | 359 |
| Optimized SGF29 | 300 | C..A.....A..T..C..T..A..A..T.....A..A.....C.....A..A..C..      | 359 |
| Wild-type SGF29 | 360 | GACCCTGCTGCAGCAGTCCGCCATGACCCTGCCCTGTGGATCGGGAAGCCTGGTGACAA    | 419 |
| Optimized SGF29 | 360 | .....T.....C.....A..C..A.....C..T.....T.....A..C..T..          | 419 |
| Wild-type SGF29 | 420 | GCCCCACCCCTCTGTGGGGCCATCCCTGCCTCAGGAGACTACGTGGCCAGACCTGGAGA    | 479 |
| Optimized SGF29 | 420 | A..A..T..T..G.....A..T..T..C..GAGC..T.....AC..C.....C..        | 479 |
| Wild-type SGF29 | 480 | CAAGGTGGCTGCCCGGTTGAAGCCGTTGGATGGGACGAGCAGTGGATCCTGGCCGAGGT    | 539 |
| Optimized SGF29 | 480 | T..A..C.....TA..A.....A..T..T.....T.....A.....TT..A..G..A..    | 539 |
| Wild-type SGF29 | 540 | GGTCAGTTACAGCATGCCACCAACAGTATGAGGTAGATGACATCGATGAAGAAGGCCAA    | 599 |
| Optimized SGF29 | 540 | A..GTCC.....T..C.....T.....C.....T.....T.....G..G..A..         | 599 |
| Wild-type SGF29 | 600 | AGAGAGACACCCCTGAGCCGGCCGTGTCTCCCGTCCCCAGTGAAGGCCAACCC          | 659 |
| Optimized SGF29 | 600 | .....C..G..T.....T.....AA..G.....G..T..A.....G..T..            | 659 |
| Wild-type SGF29 | 660 | GGAGACGGACCCTGAGCCCTTGTCCAGAAAGGACAGCTCGTGTGGCCCTGTATCCCA      | 719 |
| Optimized SGF29 | 660 | T..A..C.....C..T.....A.....A..C..T.....A..                     | 719 |
| Wild-type SGF29 | 720 | GACTACCTGCTTCTACCGCCCTGATCCATGCGCCCCACAGCGGCCCCAGGATGACTA      | 779 |
| Optimized SGF29 | 720 | .....A..G..T.....TT.....A..C.....A..T.....A..A..A.....C.....   | 779 |
| Wild-type SGF29 | 780 | CTCGGTCTGTGTTGAAGACACCTCCTATGCAGATGGCTATCCCTCCCTCAATGTGGC      | 839 |
| Optimized SGF29 | 780 | TAGC..G.....T..AAG..C.....AGT.....T..G.....                    | 839 |
| Wild-type SGF29 | 840 | TCAGAGATACGTGGTGGCTTGAAGGAACCAAGAAAAAG                         | 879 |
| Optimized SGF29 | 840 | C..AC..C.....T.....G..C..A..G.....A.....                       | 879 |

**B**

**Peptide sequence Identities: 293/293 (100%)**

|                 |     |                                                               |     |
|-----------------|-----|---------------------------------------------------------------|-----|
| Wild-type SGF29 | 1   | MALVSADSRIAELLTELHQLIKQTQEERSRSEHNLVNIQKHTERMOTENKISPPYRTRKLR | 60  |
| Optimized SGF29 | 1   | MALVSADSRIAELLTELHQLIKQTQEERSRSEHNLVNIQKHTERMOTENKISPPYRTRKLR | 60  |
| Wild-type SGF29 | 61  | GLYTTAKADAEAEENILRKALDKIAEIKSLLEERRIAAKIAGLYNDEPPRKTMRRGVLM   | 120 |
| Optimized SGF29 | 61  | GLYTTAKADAEAEENILRKALDKIAEIKSLLEERRIAAKIAGLYNDEPPRKTMRRGVLM   | 120 |
| Wild-type SGF29 | 121 | TLLQOSAMTLPWIGKPGDKPPPLCGAIPASGDYVARPGDKVAARVKAVDGEQWILAEV    | 180 |
| Optimized SGF29 | 121 | TLLQOSAMTLPWIGKPGDKPPPLCGAIPASGDYVARPGDKVAARVKAVDGEQWILAEV    | 180 |
| Wild-type SGF29 | 181 | VSYSHATNKYEVDDIDEEGKERHTLSRRRVIPLPQWKANPETDPEALFQKEQLVLALYPQ  | 240 |
| Optimized SGF29 | 181 | VSYSHATNKYEVDDIDEEGKERHTLSRRRVIPLPQWKANPETDPEALFQKEQLVLALYPQ  | 240 |
| Wild-type SGF29 | 241 | TTCFYRALIHAPPQRPQDDYSVLFEDTSYADGYSPLNVAQRYVVACKEPKKK          | 293 |
| Optimized SGF29 | 241 | TTCFYRALIHAPPQRPQDDYSVLFEDTSYADGYSPLNVAQRYVVACKEPKKK          | 293 |

**fig. S4. Design of the optimized SGF29 cDNA construct.**

(A) The cDNA sequence of the optimized SGF29 construct (contains synonymous mutations) shares 77% identity with the wild-type human *SGF29* cDNA. The switched nucleotides in the optimized *SGF29* cDNA are labeled (red), which facilitates the protein expression via optimizing the codon usage (CLC Genomics Workbench, QIAGEN). The optimized SGF29 cDNA also introduces miss-matched sequences within the sgSGF29-dual #1 (blue) and #2 (green) landing sites, thus, allowing reconstitution of SGF29 protein expression in the sgSGF29-dual targeted cells shown in Fig. 3. (B) The peptide sequence of the optimized SGF29 construct shares 100% identity with the wild-type human SGF29 peptide.

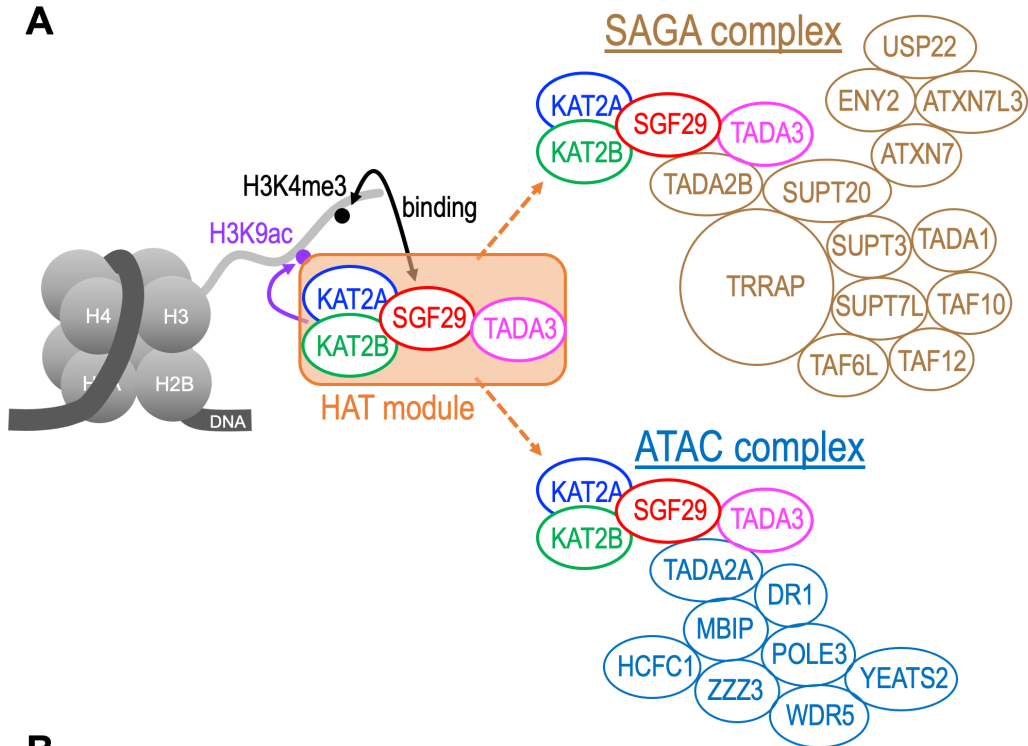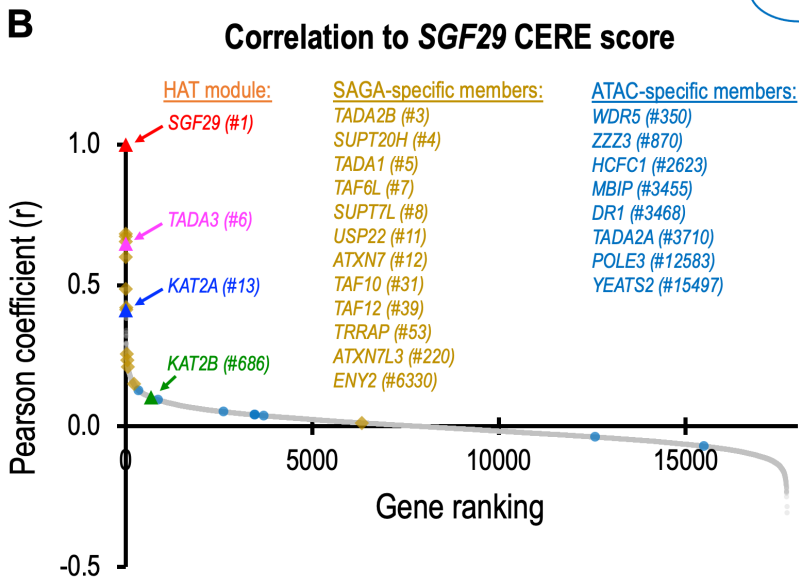

**fig. S5. Participation of *SGF29* in SAGA and ATAC complexes.**

**(A)** Schematic outline of SAGA and ATAC complexes. **(B)** Gene ranking based on the Pearson coefficient (*r*) of the CERES scores between *SGF29* and a total of 17,709 genes examined in the DepMap genome-wide CRISPR screen consortium database (source: <https://depmap.org/portal/>; BROAD Institute). The SAGA-specific (dark yellow) and ATAC-specific (dark blue) members are labeled. In addition, there are four overlapped members, including *SGF29* (red), *TADA3* (pink), *KAT2A* (blue), and *KAT2B* (green), formed the histone acetyltransferase (HAT) module (orange box in panel A) that participate in both SAGA and ATAC complexes.

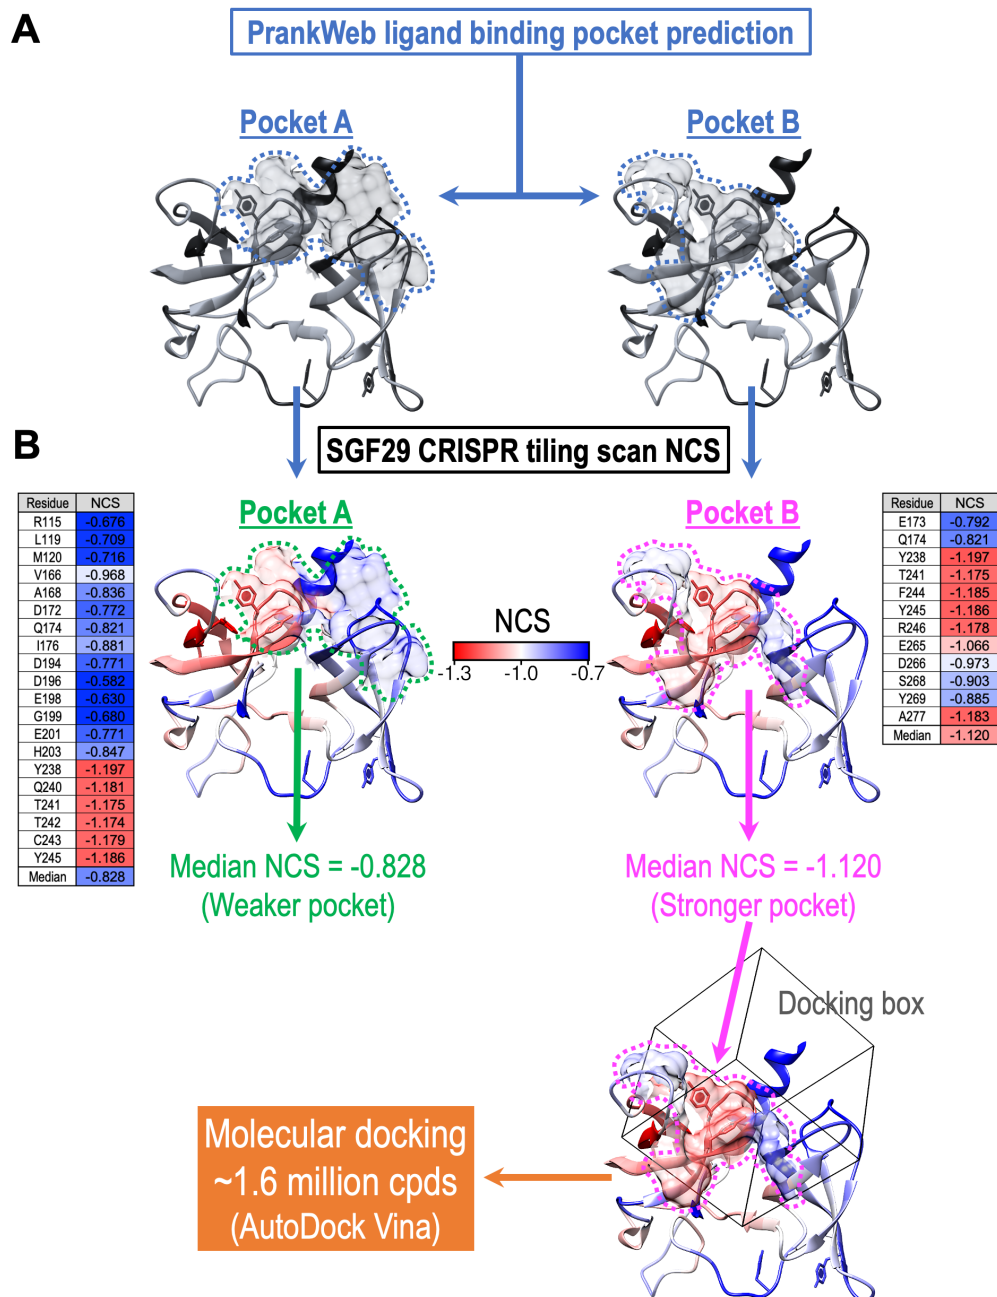

**fig. S6. Determination of the SGF29 surface pocket for molecular docking.**

(A) PrankWeb server predicted top two ligandable protein surface areas, Pocket A and Pocket B, on the SGF29 TTD domain (PDB ID: 3ME9). (B) Evaluation of the SGF29 CRISPR tiling scan revealed a stronger median NCS score in Pocket B (-1.120) than Pocket A (-0.828), indicating Pocket B as a more essential surface area on SGF29-TTD for therapeutic targeting.

**A**

|     | MV4-11 |      |     | U251 |       |       | Cpd_Name  | $\Delta$ Score (%) |                                                |
|-----|--------|------|-----|------|-------|-------|-----------|--------------------|------------------------------------------------|
|     | d3     | d6   | d9  | d3   | d6    | d9    |           |                    |                                                |
|     | 0.4    | 0.2  | 0.2 | 14.5 | 0.8   | 0.2   | I-BET151  | (0.0)              | BET inhibitor<br><i>Dawson et al. (36)</i>     |
|     | 0.3    | 0.2  | 0.3 | 17.0 | 0.6   | 0.1   | JQ1       | (0.1)              | BRD4 inhibitor<br><i>Zuber et al. (10)</i>     |
| #1  | 69.0   | 5.0  | 0.3 | 95.0 | 105.6 | 102.3 | EPZ-5676  | (-102.1)           | Candidate compounds                            |
| #2  | 2.4    | 0.2  | 0.1 | 96.7 | 102.5 | 96.8  | Cpd_DC60  | (-96.7)            |                                                |
| #3  | 30.0   | 15.4 | 2.5 | 89.2 | 100.3 | 99.1  | Cpd_DC201 | (-96.6)            |                                                |
| #4  | 46.0   | 14.5 | 2.8 | 90.7 | 94.0  | 81.9  | Cpd_DC11  | (-79.1)            |                                                |
| #5  | 33.7   | 6.3  | 0.0 | 83.0 | 89.7  | 73.6  | Cpd_DC157 | (-73.6)            |                                                |
| #6  | 24.0   | 1.9  | 0.5 | 91.3 | 68.3  | 66.2  | Cpd_DC182 | (-65.7)            |                                                |
| #7  | 20.3   | 1.3  | 0.2 | 83.5 | 71.4  | 55.1  | Cpd_DC21  | (-54.9)            |                                                |
| #8  | 41.1   |      | 1.6 | 93.7 | 76.2  | 55.1  | Cpd_DC16  | (-53.5)            |                                                |
| #9  | 25.3   | 7.6  | 9.5 | 67.3 | 49.5  | 46.8  | Cpd_DC176 | (-37.2)            |                                                |
| #10 | 25.4   | 10.3 | 5.0 | 55.9 | 55.7  | 37.4  | Cpd_DC165 | (-32.4)            | WDR5 inhibitor<br><i>Grebien et al. (38)</i>   |
| #11 | 23.1   | 7.1  | 2.1 | 71.4 | 51.0  | 30.7  | Cpd_DC171 | (-28.7)            |                                                |
| #12 | 68.8   | 36.0 | 5.0 | 82.5 | 46.1  | 26.2  | OICR-9429 | (-21.3)            |                                                |
| #13 | 29.1   | 11.0 | 2.8 | 49.6 | 42.8  | 23.3  | Cpd_DC160 | (-20.5)            |                                                |
| #14 | 17.9   | 0.4  | 0.2 | 57.0 | 28.8  | 15.8  | A-485     | (-15.7)            | P300/CBP inhibitor<br><i>Lasko et al. (39)</i> |
| #15 | 51.5   | 3.4  | 0.2 | 59.8 | 29.4  | 15.7  | Cpd_DC244 | (-15.5)            |                                                |
| #16 | 0.1    | 0.0  | 0.0 | 61.2 | 33.2  | 14.6  | Cpd_DC196 | (-14.6)            |                                                |
| #17 | 89.6   | 39.5 | 6.0 | 92.2 | 59.4  | 19.8  | A-366     | (-13.8)            | G9a inhibitor<br><i>Pappano et al. (40)</i>    |
| #18 | 33.3   | 11.0 | 1.4 | 50.7 | 28.5  | 14.7  | Cpd_DC148 | (-13.3)            |                                                |
| #19 | 41.6   | 14.8 | 4.4 | 87.4 | 48.7  | 11.0  | Cpd_DC23  | (-6.5)             |                                                |

**B**

| Cpd Name                                                                                                          | ZINC ID                                                                                                             | $\Delta G^\circ$ (kJ/mol)*                                                                                          |                                                                                                                    |                                                                                                                                 |
|-------------------------------------------------------------------------------------------------------------------|---------------------------------------------------------------------------------------------------------------------|---------------------------------------------------------------------------------------------------------------------|--------------------------------------------------------------------------------------------------------------------|---------------------------------------------------------------------------------------------------------------------------------|
| Cpd_DC60                                                                                                          | ZINC000090751663                                                                                                    | -9.7                                                                                                                | 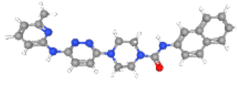                                |                                             |
| Cpd_DC201                                                                                                         | ZINC000102713262                                                                                                    | -9.5                                                                                                                |                                                                                                                    |                                                                                                                                 |
| Cpd_DC11                                                                                                          | ZINC000065362194                                                                                                    | -10.3                                                                                                               | Cpd_DC11 (C <sub>25</sub> H <sub>25</sub> N <sub>7</sub> O)<br>Mwt. 439.5 g/mol<br>ZINC000065362194                | Cpd_DC21 (C <sub>27</sub> H <sub>26</sub> F <sub>3</sub> N <sub>5</sub> O <sub>2</sub> )<br>Mwt. 509.5 g/mol<br>ZINC00012244660 |
| Cpd_DC157                                                                                                         | ZINC000102597834                                                                                                    | -9.7                                                                                                                |                                                                                                                    |                                                                                                                                 |
| Cpd_DC182                                                                                                         | ZINC000029064337                                                                                                    | -9.6                                                                                                                |                                                                                                                    |                                                                                                                                 |
| Cpd_DC21                                                                                                          | ZINC000012244660                                                                                                    | -10.2                                                                                                               |                                                                                                                    |                                                                                                                                 |
| *Predicted by AutoDock Vina                                                                                       |                                                                                                                     |                                                                                                                     |                                                                                                                    |                                                                                                                                 |
|                                |                                  |                                 |                               |                                                                                                                                 |
| Cpd_DC60 (C <sub>33</sub> H <sub>33</sub> N <sub>3</sub> O <sub>3</sub> )<br>Mwt. 519.6 g/mol<br>ZINC000090751663 | Cpd_DC157 (C <sub>33</sub> H <sub>35</sub> FN <sub>6</sub> O <sub>4</sub> )<br>Mwt. 598.7 g/mol<br>ZINC000102597834 | Cpd_DC182 (C <sub>29</sub> H <sub>26</sub> N <sub>6</sub> O <sub>5</sub> S)<br>Mwt. 570.6 g/mol<br>ZINC000029064337 | Cpd_DC201 (C <sub>32</sub> H <sub>31</sub> N <sub>5</sub> O <sub>5</sub> )<br>Mwt. 565.6 g/mol<br>ZINC000102713262 |                                                                                                                                 |

**fig. S7. Information of the candidate SGF29 targeting compounds.**

(A) Detail CellTiter Glo data of the MV4-11 selective group (19 cpds) from Fig. 5E. Four reference compounds from the MV4-11 selective group (EPZ-5676, OICR-9429, A-485, and A-366) and two from the general toxic group (I-BET151 and JQ1) are labeled in green.  $\Delta$  Score indicates CellTiter Glo % ([MV4-11] – [U251]) on day 9. Six compounds with stronger MV4-11 selective killing effects (i.e., lower  $\Delta$  Score) are selected as candidate SGF29 inhibitors (highlighted in black). (B) ZINC database ID, predicted binding free energy ( $\Delta G^\circ$ ) to SGF29-TTD, and the chemical structure of each candidate SGF29 inhibitor are indicated with H (white), C (grey), N (blue), O (red), F (green), and S (yellow).



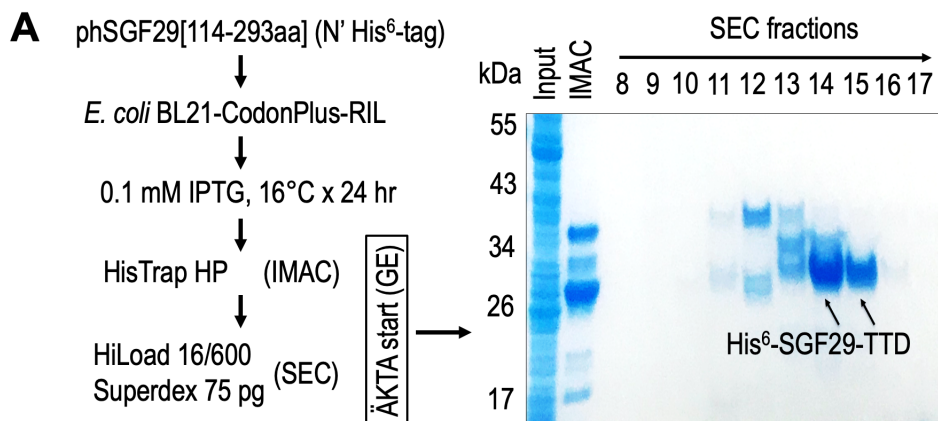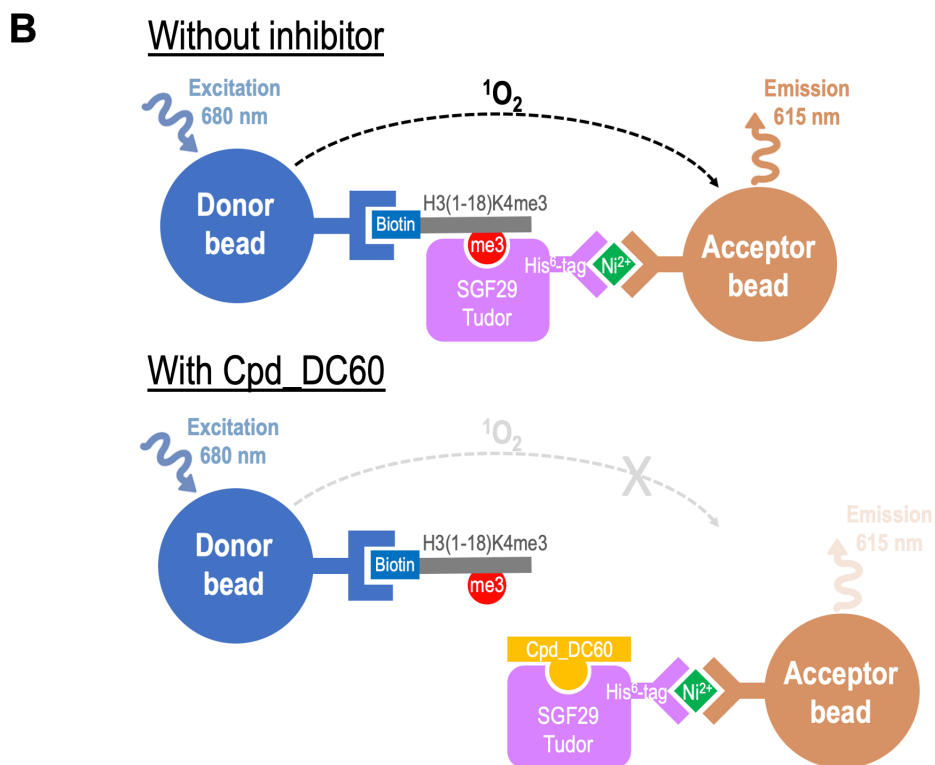

**fig. S8. AlphaScreen assay for evaluating the SGF29 Tudor domain inhibitor.**

(A) Purification of bacterial expressed recombinant human SGF29-TTD peptide (N' His<sup>6</sup>-tagged) using immobilized metal affinity chromatography (IMAC) and size exclusion chromatography (SEC). (B) Schematic outline of AlphaScreen assay based on the interaction of SGF29-TTD with its natural ligand H3K4me3 peptide.

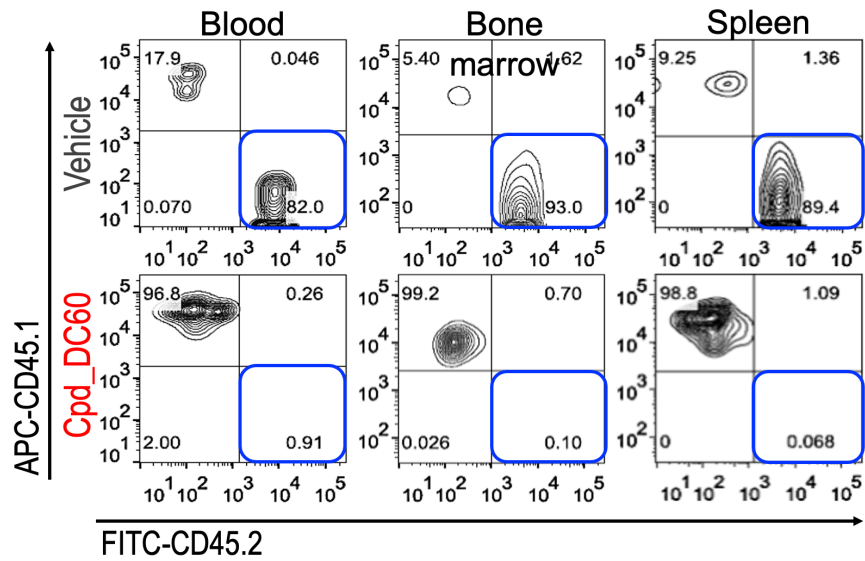

**fig. S9. Analysis of CD45.2<sup>+</sup> leukemia engraftment using flow cytometry.**

Representative CD45.1 and CD45.2 flow cytometric profiles in the peripheral blood, bone marrow, and spleen of the CD45.1<sup>+</sup> recipient mice with or without Cpd\_DC60 treatment.

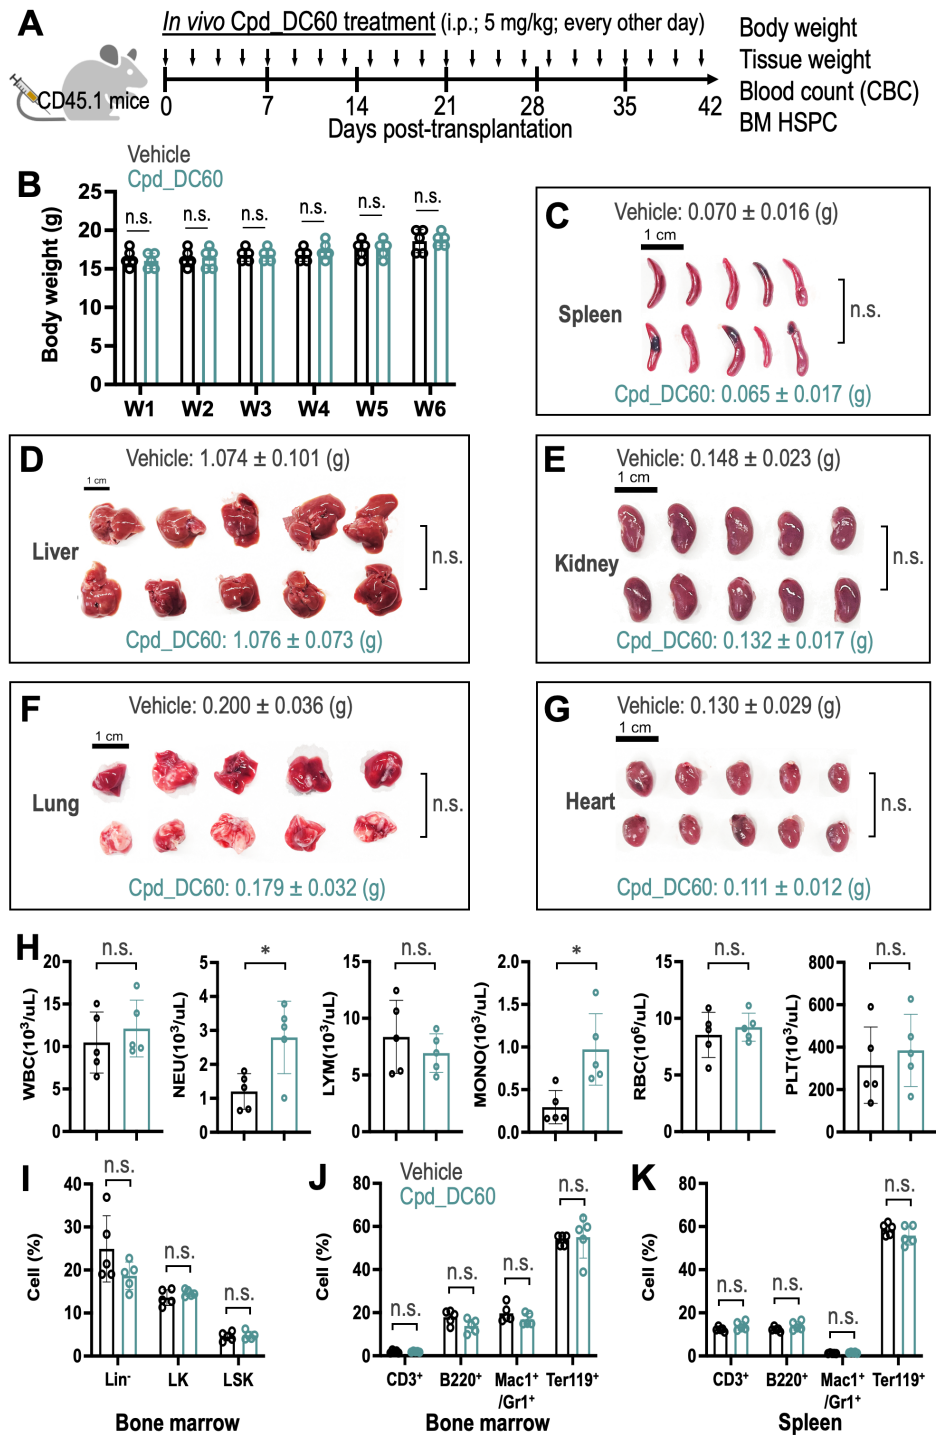

**fig. S10. Toxicity evaluation of *in vivo* Cpd\_DC60 treatment.**

(A) Schematic outline of a 6-week long *in vivo* toxicity evaluation with alternate-day dosing of 5 mg/kg Cpd\_DC60 in C57BL/6 CD45.1 mice (n = 5 mice per group). (B) Mouse body weight, (C-G) organ morphology and size, and (H) complete blood count of peripheral blood cell populations after six weeks of Cpd\_DC60 treatment. (I) Lineage-negative (Lin<sup>-</sup>), hematopoietic progenitor (LK), and hematopoietic stem/progenitor (LSK) cells in bone marrow, and (J, K) T cells (CD3<sup>+</sup>), B cells (B220<sup>+</sup>), myeloid cells (Mac1<sup>+</sup>/Gr1<sup>+</sup>), and red blood cells (Ter119<sup>+</sup>) in bone marrow and spleen. Data are represented as mean ± SD. \*P < 0.05 by two-sided Student's t-test.

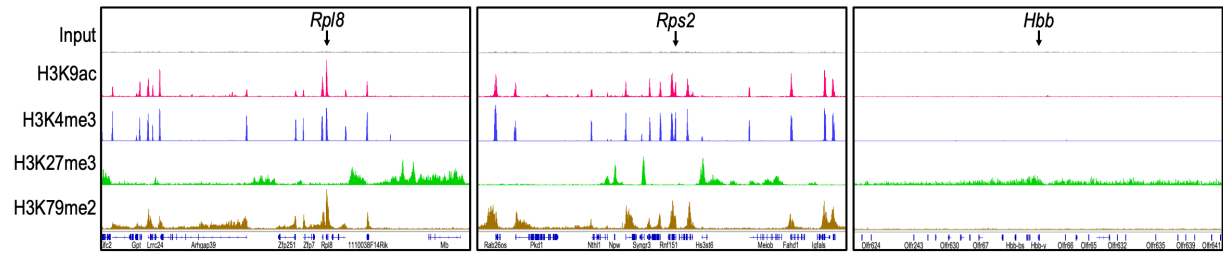

**fig. S11. Chromatin distribution of H3K9ac and H3K4me3.**

ChIP-seq profiles of H3K9ac (red), H3K4me3 (blue) at (left) *Rpl8*, (mid) *Rps2*, and (right) *Hbb* loci in mouse MLL-AF9 cells. The suppressed vs. expressed euchromatin regions are indicated by the silent (H3K27me3, green) and active (H3K79me2, brown) histone marks.

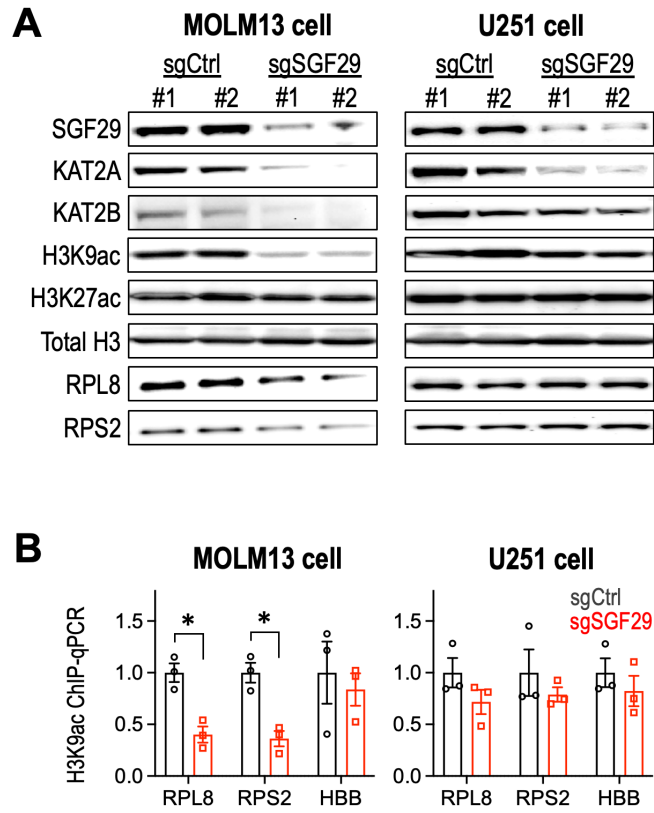

**fig. S12. Differential regulation of SGF29 pathway in MOLM13 and U251 cells.**

(A) Western blot of SGF29, KAT2A, KAT2B, H3K9ac, H3K27ac, total H3, RPL8, RPS2 and (B) H3K9ac ChIP-qPCR in SGF29-dependent (MOLM13 leukemia) and SGF29-independent (U251 glioblastoma) human cell lines.

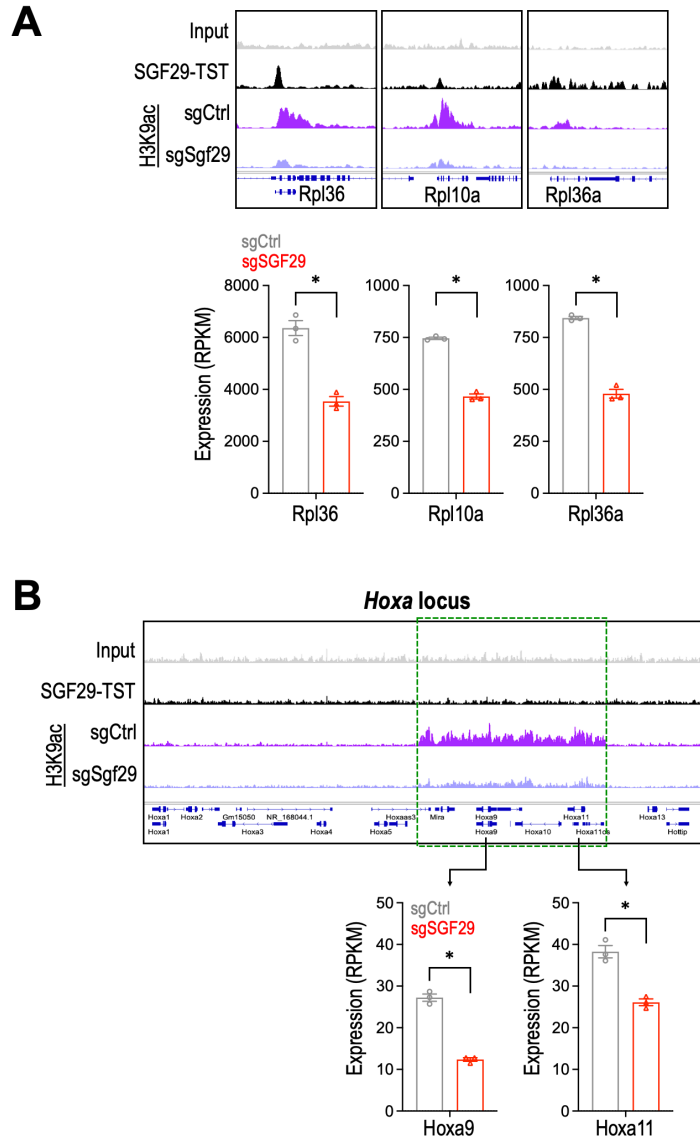

**fig. S13. Effect of SGF29 on additional chromatin loci.**

Distribution of SGF29-TST and H3K9ac ChIP-seq signal at **(A)** *Rpl36*, *Rpl10a*, *Rpl36a* and **(B)** *Hoxa* loci in mouse MLL-AF9 leukemia cells.

table S1. *MLL-r* leukemia patient cells used in this study.

| Patient ID | TYPE    | VARIANT | GENE    | PROTEIN CHANGE | CDS CHANGE         | COVERAGE                   | % READS | CNA-TYPE | RE-GENE2 | RE-DESCRIPTION |  |
|------------|---------|---------|---------|----------------|--------------------|----------------------------|---------|----------|----------|----------------|--|
| 042        | somatic | RE      | KMT2A   |                |                    |                            |         |          | AFF1     | fusion         |  |
|            | somatic | RE      | MLL     |                |                    |                            |         |          | MAPK10   | RE             |  |
|            | VUS     | SNV     | FAM123B | Y599C          | 1796A>G            | 432                        | 100%    |          |          |                |  |
|            | VUS     | SNV     | MTOR    | G307R          | 919G>A             | 577                        | 2%      |          |          |                |  |
|            | somatic | SNV     | NRAS    | G13D           | 38G>A              | 505                        | 33%     |          |          |                |  |
|            | VUS     | SNV     | RAF1    | S301I          | 902G>T             | 674                        | 16%     |          |          |                |  |
|            | VUS     | SNV     | RARA    | P440L          | 1319C>T            | 377                        | 49%     |          |          |                |  |
|            | VUS     | SNV     | SMARCA4 | R359Q          | 1076G>A            | 396                        | 53%     |          |          |                |  |
|            | VUS     | SNV     | SPEN    | I2469V         | 7405A>G            | 830                        | 46%     |          |          |                |  |
|            | VUS     | SNV     | TGFBR2  | V387M          | 1159G>A            | 674                        | 49%     |          |          |                |  |
|            | somatic | SNV     | TP53    | G154S          | 460G>A             | 662                        | 50%     |          |          |                |  |
|            | somatic | SNV     | TP53    | N239D          | 715A>G             | 500                        | 0%      |          |          |                |  |
|            | somatic | SNV     | TP53    | R175H          | 524G>A             | 682                        | 2%      |          |          |                |  |
|            | somatic | SNV     | TP53    | R248W          | 742C>T             | 663                        | 1%      |          |          |                |  |
|            | somatic | SNV     | TP53    | T256A          | 766A>G             | 500                        | 0%      |          |          |                |  |
|            | VUS     | SNV     | TSHR    | I155L          | 463A>T             | 399                        | 47%     |          |          |                |  |
|            | 049     | somatic | InDel   | CREBBP         | Q1079fs*8          | 3234_3235insT              | 418     | 23%      |          |                |  |
|            |         | somatic | InDel   | ETV6           | F102fs*21          | 305_306insGT               | 357     | 24%      |          |                |  |
|            |         | VUS     | InDel   | PCLO           | S4296_S4297insSRPS | 12888_12889insTCCAGACCTTCC | 653     | 26%      |          |                |  |
| somatic    |         | RE      | MLL     |                |                    |                            |         |          | AFF1     | fusion         |  |
| somatic    |         | SNV     | CHEK1   | W328L          | 983G>T             | 518                        | 0%      |          |          |                |  |
| somatic    |         | SNV     | CREBBP  | S381*          | 1142C>A            | 500                        | 0%      |          |          |                |  |
| somatic    |         | SNV     | CREBBP  | splice         | 3836+1G>A          | 424                        | 11%     |          |          |                |  |
| VUS        |         | SNV     | CREBBP  | R714H          | 2141G>A            | 456                        | 44%     |          |          |                |  |
| VUS        |         | SNV     | CSF1R   | E557K          | 1669G>A            | 501                        | 47%     |          |          |                |  |
| VUS        |         | SNV     | EPHA5   | H329N          | 985C>A             | 501                        | 0%      |          |          |                |  |
| VUS        |         | SNV     | EPHB1   | R367H          | 1100G>A            | 514                        | 43%     |          |          |                |  |
| VUS        |         | SNV     | IRS2    | H1147Q         | 3441C>G            | 421                        | 51%     |          |          |                |  |
| somatic    |         | SNV     | MAP3K13 | splice         | 6601G>T            | 500                        | 0%      |          |          |                |  |
| VUS        |         | SNV     | PARP3   | E476K          | 1426G>A            | 288                        | 51%     |          |          |                |  |
| VUS        |         | SNV     | PARP4   | V459A          | 1376T>C            | 249                        | 49%     |          |          |                |  |
| VUS        |         | SNV     | PRDM1   | R302P          | 905G>C             | 591                        | 52%     |          |          |                |  |
| VUS        |         | SNV     | RAD51L3 | L53M           | 157C>A             | 295                        | 0%      |          |          |                |  |
| VUS        |         | SNV     | ROS1    | V849F          | 2545G>T            | 440                        | 52%     |          |          |                |  |
| VUS        |         | SNV     | SMARCA1 | P840T          | 2518C>A            | 699                        | 35%     |          |          |                |  |
| 072        | somatic | CNA     | CDKN2A  |                |                    |                            |         |          | loss     |                |  |
|            | somatic | CNA     | CDKN2B  |                |                    |                            |         |          | loss     |                |  |
|            | somatic | RE      | KMT2A   |                |                    |                            |         |          | AFF1     | fusion         |  |
|            | VUS     | SNV     | DDR2    | R668H          | 2003G>A            | 685                        | 55%     |          |          |                |  |
|            | VUS     | SNV     | FANCM   | V1336D         | 4007T>A            | 710                        | 48%     |          |          |                |  |
|            | VUS     | SNV     | GATA2   | P161A          | 481C>G             | 631                        | 49%     |          |          |                |  |
|            | VUS     | SNV     | JAK3    | R432C          | 1294C>T            | 497                        | 50%     |          |          |                |  |
|            | VUS     | SNV     | KDM6A   | T584M          | 1751C>T            | 814                        | 50%     |          |          |                |  |
|            | somatic | SNV     | KRAS    | G12S           | 34G>A              | 723                        | 2%      |          |          |                |  |
|            | VUS     | SNV     | MAGED1  | A101T          | 301G>A             | 581                        | 52%     |          |          |                |  |
|            | VUS     | SNV     | MLL3    | L3311F         | 9931C>T            | 804                        | 49%     |          |          |                |  |
|            | VUS     | SNV     | NF1     | R2269H         | 6806G>A            | 511                        | 48%     |          |          |                |  |
|            | somatic | SNV     | NRAS    | G12S           | 34G>A              | 650                        | 17%     |          |          |                |  |
|            | somatic | SNV     | NRAS    | Q61R           | 182A>G             | 668                        | 1%      |          |          |                |  |
|            | VUS     | SNV     | PARP3   | A33G           | 98C>G              | 614                        | 48%     |          |          |                |  |
|            | somatic | SNV     | PIK3CA  | E545K          | 1633G>A            | 498                        | 3%      |          |          |                |  |
|            | VUS     | SNV     | TCF3    | R371*          | 1111C>T            | 726                        | 12%     |          |          |                |  |
|            | VUS     | SNV     | TCF3    | P4L            | 11C>T              | 681                        | 50%     |          |          |                |  |

Leukemia patient cells reported in Wang et al. (41)

**Supplementary excel tables:**

- Data S1** List of Tudor domains and Tudor domain-containing genes.
- Data S2** QC sequencing of the Tudor domain-focused CRISPR library.
- Data S3** High-throughput sequencing of the Tudor domain-focused CRISPR screen (RPMR).
- Data S4** Histone modification mass spec data table.
- Data S5** List of Sgf29-regulated genes.
- Data S6** Sgf29 binding signal at the TSS +/- 1kb of the Sgf29-regulated genes.
- Data S7** QC sequencing of the Sgf29 CRISPR tiling scan library.
- Data S8** High-throughput sequencing of the Sgf29 CRISPR tiling scan (RPMR).
- Data S9** Information of the compounds selected for CellTiter Glo assay in MV4-11 and U251 cells.
- Data S10** Normalized CRISPR score (NCS) of Dot1l, Mof, and Lsd1 CRISPR tiling in mouse MLL-AF9 leukemia cells.
